# Supplementary material for: An Improved Phenotyping Method for Evaluation of Yam (Dioscorea spp.) Resistance to Nematodes Belonging to the Genera Meloidogyne and Scutellonema
Source: MDPI journal article supplement (doi:10.3390/plants13091175), 2024-04-23
Supplement: s1 [file s1]

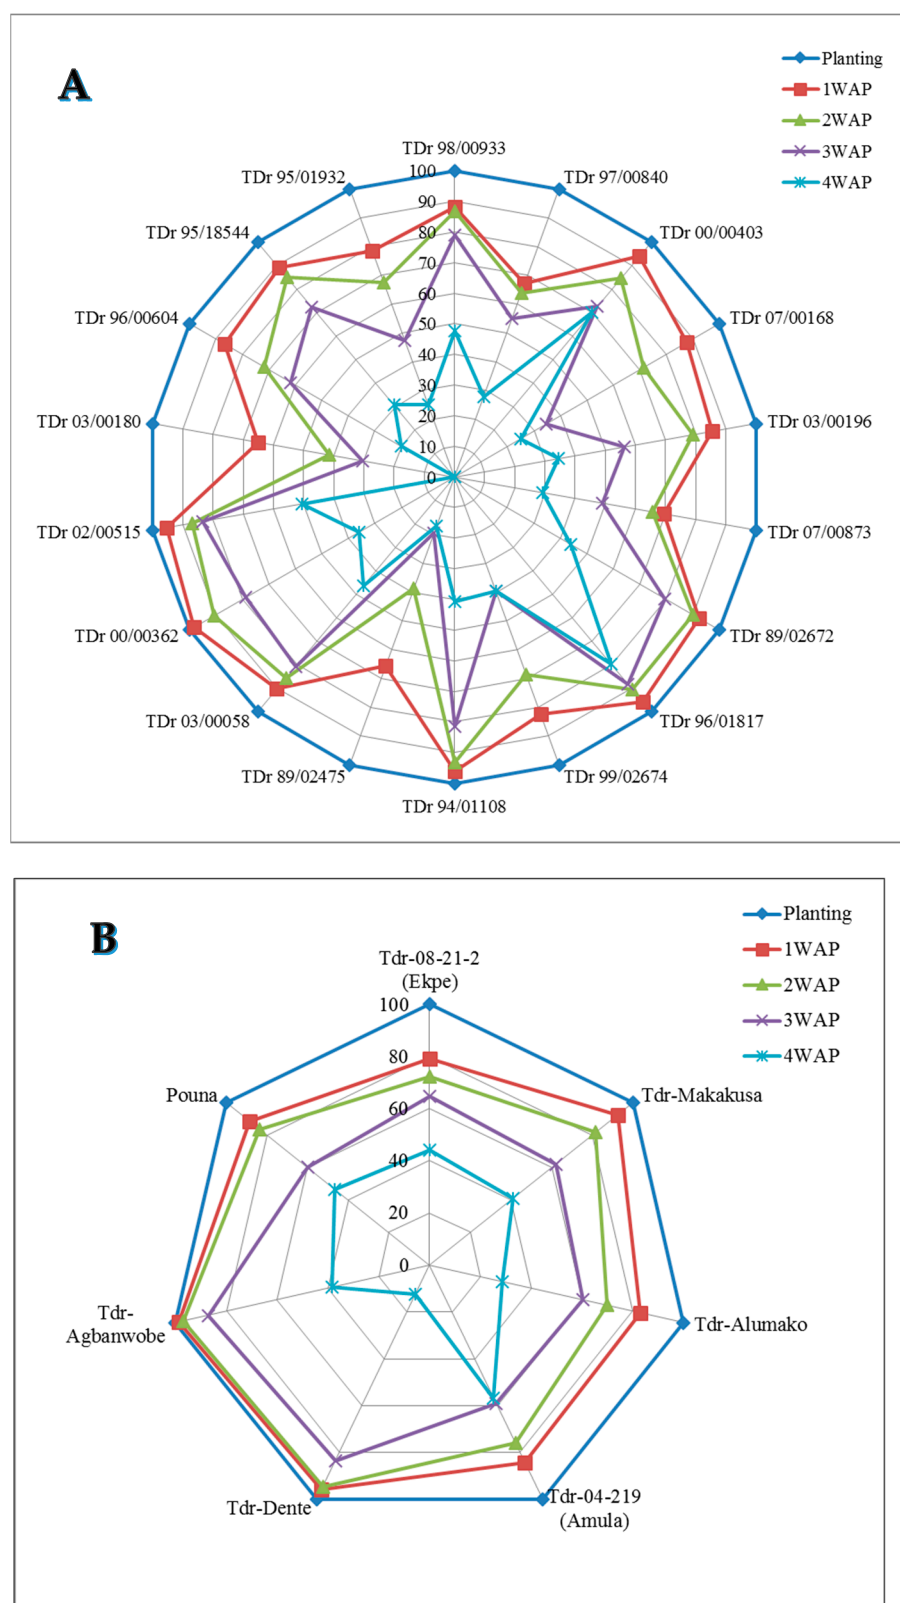

**Supplementary Figure S1.** (A) Yam vine cuttings survival rate (%) of 17 Breeder's and one released yam genotype four weeks after planting (WAP). (B) Yam vine cuttings survival rate (%) of seven landraces 4 WAP.

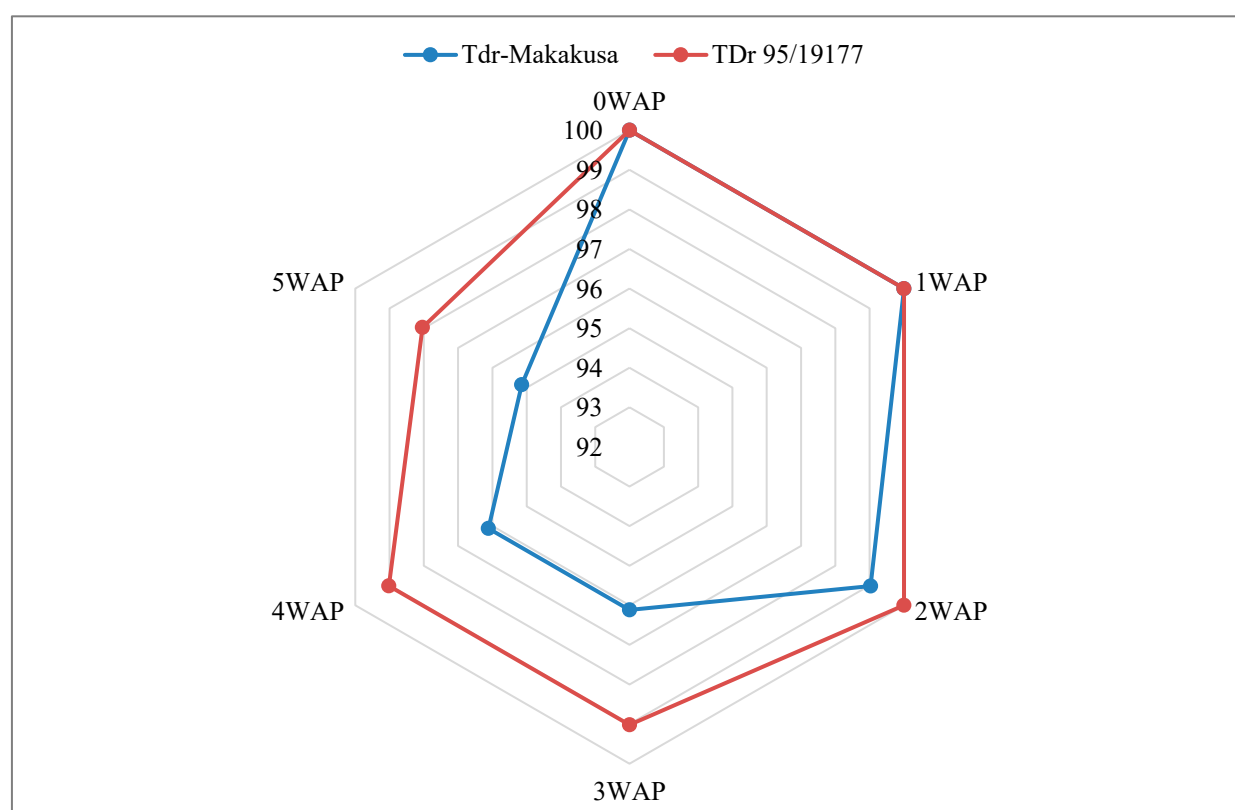

**Supplementary Figure S2.** Yam semi-autotrophic hydroponics (SAH) survival rate (%) of two selected genotypes Tdr-Makakusa and TDr95/19177 five weeks after planting (WAP).

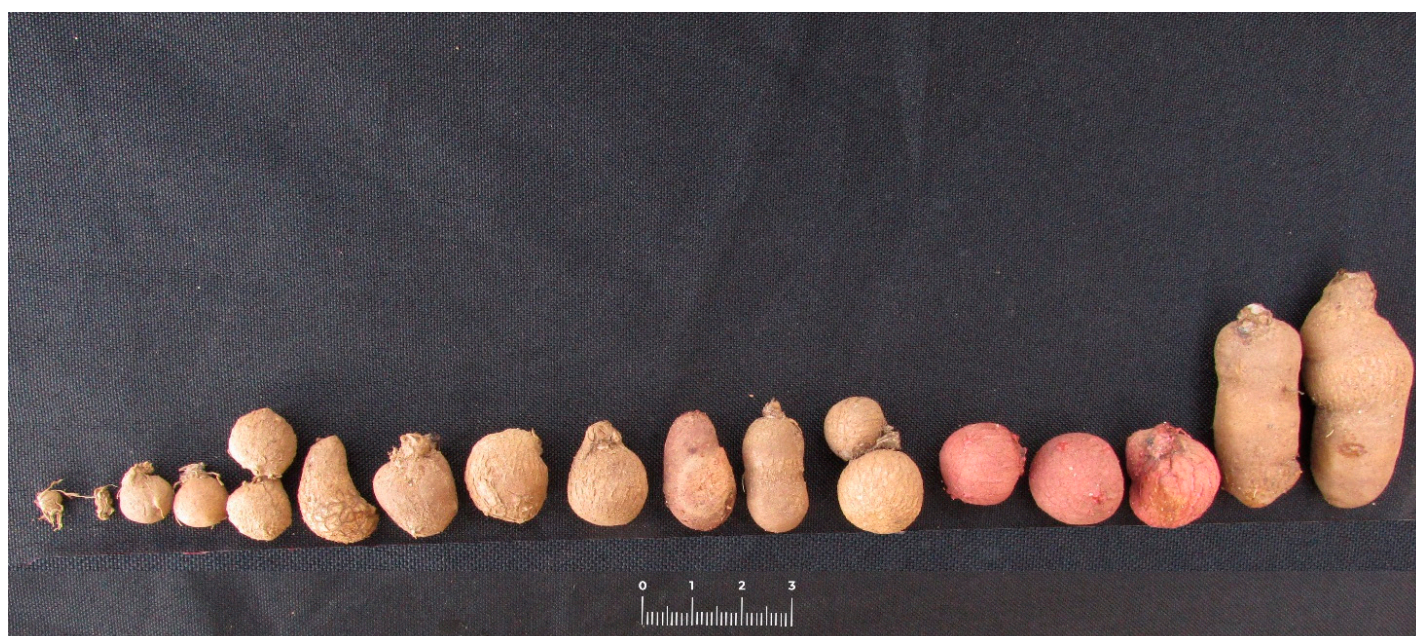

**Supplementary Figure S3.** Tubers of variable sizes harvested from yam vine cuttings survival rate 12 weeks after transplantation. Scale bar: 1 unit=1 cm

**Supplementary Table S1.** Tuber weight, galling index (GI), nematode density in roots and rating of accessions inoculated with *Meloidogyne incognita*.

| Type               | No | Genotype            | Tuber weight <sup>a</sup> (g) ± SE |                     | Nematode g <sup>-1</sup><br>root | GI  | Rating |
|--------------------|----|---------------------|------------------------------------|---------------------|----------------------------------|-----|--------|
|                    |    |                     | Control                            | <i>M. incognita</i> | Mean (Min-Max)                   |     |        |
| Breeder's<br>lines | 1  | TDr 03/00196        | 0                                  | 0                   | 66.7 (0 -200)                    | 2   | R      |
|                    | 2  | TDr 00/00362        | 0.5 B ± 0                          | 0.6 B ± 0.1         | 13.3 (0 -40)                     | 1.5 | R      |
|                    | 3  | TDr 95/01932        | 0.3 B                              | 0.4 B ± 0.2         | 0                                | 1.8 | R      |
|                    | 4  | TDr 94/01108        | 0.2 B ± 0.1                        | 0.5 B ± 0.4         | 0                                | 1.8 | R      |
|                    | 5  | TDr 03/00180        | 0.8 B ± 0.3                        | 0.6 B ± 0.1         | 0                                | 1.6 | R      |
|                    | 6  | TDr 96/00604        | 0.1 B                              | 0.4 B ± 0.1         | 0                                | 1.7 | R      |
|                    | 7  | TDr 99/02674        | 0.1 B ± 0.1                        | 0.2 B ± 0           | 4.7 (0 -19)                      | 2   | R      |
|                    | 8  | TDr 89/02475        | 0.2 B ± 0                          | 0.6 B ± 0.2         | 0                                | 1.3 | R      |
|                    | 9  | TDr 89/02672        | 0.7 B ± 0.2                        | 0.8 B ± 0.2         | 23.8 (0 -167)                    | 2.2 | HS     |
|                    | 10 | TDr 96/01817        | 1.0 B ± 0.4                        | 1.6 B ± 0.8         | 47.4 (0 -140)                    | 2.6 | HS     |
|                    | 11 | TDr 97/00840        | 0.4 B ± 0.2                        | 0.3 B ± 0.1         | 38.1 (0 -167)                    | 2.4 | HS     |
|                    | 12 | TDr 07/00873        | .                                  | 0.1 B               | 0                                | 1.8 | R      |
|                    | 13 | TDr 02/00515        | 0.6 B ± 0.4                        | 0.8 B ± 0.4         | 11.4 (0 -58)                     | 2.6 | HS     |
|                    | 14 | TDr 00/00403        | 0.3 B ± 0.2                        | 0.5 B ± 0.2         | 50 (0 -200)                      | 2.2 | HS     |
|                    | 15 | TDr 07/00168        | 1.0 B                              | 0.5 B ± 0.1         | 11.1 (0 -50)                     | 2.6 | HS     |
|                    | 16 | TDr 95/18544        | 1.0 B ± 0.3                        | 0.8 B ± 0.2         | 601.5 (0 -1800)                  | 2.6 | HS     |
|                    | 17 | TDr 98/00933        | 0.4 B ± 0.1                        | 0.7 B ± 0.3         | 131.8 (0 -903)                   | 2.7 | HS     |
|                    | 18 | TDr 01/00405        | 3.2 A ± 0.7                        | 2.5 A ± 1.0         | 0                                | 2.5 | HS     |
|                    | 19 | TDr 03/00058        | 2.0 B ± 0.4                        | 1.6 B ± 0.4         | 43.8 (0 -243)                    | 3   | HS     |
| P                  |    |                     | <.0001                             | 0.0426              | 0.2638                           |     |        |
| Landrace           | 20 | TDr Dente           | 0.2 A ± 0.1                        | 0.1 B ± 0           | 0                                | 1.3 | R      |
|                    | 21 | TDr Agbanwobe       | 0.4 A ± 0.2                        | 0.4 B ± 0.2         | 75 A (0 -150)                    | 2   | R      |
|                    | 22 | TDr 08-21-2 (Ekpe)  | 0.8 A ± 0.3                        | 1.5 A ± 0.3         | 49.5 A (0 -170)                  | 1.9 | R      |
|                    | 23 | TDr Alumako         | 0.5 A ± 0.2                        | 0.2 B ± 0.1         | 0                                | 1   | R      |
|                    | 24 | TDr 04-219 (Am-ula) | 0.9 A ± 0.2                        | 0.8 B ± 0.2         | 11.4 A (0 -58)                   | 1.4 | R      |
|                    | 25 | TDr Makakusa        | 0.2 A ± 0.1                        | 0.2 B ± 0.1         | 288.6 A (0 -1700)                | 2.3 | HS     |
|                    | 26 | TDr Pouna           | 0.8 A ± 0.3                        | 0.1 B ± 0           | 100 A (0 -400)                   | 2.4 | HS     |
| P                  |    |                     | 0.3807                             | 0.0002              | 0.6922                           |     |        |

SE= Standard Error, GI= galling index, **Rating**=Host reaction rating (**R**=Resistant, **HS**=Hyper susceptible, **na**=not applicable due to shortage of planting material), Galling score: 1-5 where 1 represents 0 galls and 5 represents >30 galls per root system. Tubers weights with the same letter in the same column are not significantly different according to the SNK test ( $P \leq 0.05$ ); when no significant different no letter is assigned. **Nematode g<sup>-1</sup>** = number of nematodes per gram of root, <sup>a</sup> Means are values of seven replicates.

**Supplementary Table S2.** Tuber weight, plant galling index (GI), nematode produced and rating of accessions reaction to *Meloidogyne javanica*.

| Type               | No | Genotype            | Tuber Weight (g) ± SE |                    | Nematode g <sup>-1</sup><br>root | GI  | Rating |
|--------------------|----|---------------------|-----------------------|--------------------|----------------------------------|-----|--------|
|                    |    |                     | Control               | <i>M. javanica</i> | Mean (Min-Max)                   |     |        |
| Breeder's<br>lines | 1  | TDr 03/00196        | 0                     | 0.2 B ± 0.1        | 0                                | 1.5 | R      |
|                    | 2  | TDr 00/00362        | 0.5 B ± 0             | 0.5 B ± 0.1        | 0                                | 1.8 | R      |
|                    | 3  | TDr 95/01932        | 0.3 B                 | 0.1 B              | 0                                | 1   | R      |
|                    | 4  | TDr 94/01108        | 0.2 B ± 0.1           | 0.5 B ± 0.1        | 11.8 (0 -40)                     | 1.8 | R      |
|                    | 5  | TDr 03/00180        | 0.8 B ± 0.3           | 0.6 B ± 0.4        | 21.4 (0 -65)                     | 1.7 | R      |
|                    | 6  | TDr 96/00604        | B ± 0.19.9            | 2.4 AB ± 1.3       | 0                                | 1.8 | R      |
|                    | 7  | TDr 99/02674        | 0.1 B ± 0.1           | 0.3 B ± 0.1        | 0                                | 1   | R      |
|                    | 8  | TDr 89/02475        | 0.2 B ± 0             | 0.3 B ± 0.1        | 0                                | 1.4 | R      |
|                    | 9  | TDr 89/02672        | 0.7 B ± 0.2           | 0.9 B ± 0.3        | 4.2 (0 -25)                      | 1.4 | R      |
|                    | 10 | TDr 96/01817        | 1.0 B ± 0.4           | 1.6 AB ± 0.4       | 6.7 (0 -28)                      | 1.9 | R      |
|                    | 11 | TDr 97/00840        | 0.4 B ± 0.2           | 1.0 B ± 0.2        | 38.6 (0 -146)                    | 1.7 | R      |
|                    | 12 | TDr 07/00873        | .                     | .                  | 126.4 (0 -317)                   | 1   | R      |
|                    | 13 | TDr 02/00515        | 0.6 B ± 0.4           | 0.4 B ± 0.1        | 0                                | 1.7 | R      |
|                    | 14 | TDr 00/00403        | 0.3 B ± 0.2           | 0.6 B ± 0.4        | 8.9 (0 -45)                      | 2.3 | HS     |
|                    | 15 | TDr 07/00168        | 1.0 B                 | 0.3 B ± 0.1        | 42.2 (0 -145)                    | 2.4 | HS     |
|                    | 16 | TDr 95/18544        | 1.0 B ± 0.3           | 0.7 B ± 0.1        | 14.2 (0 -75)                     | 2.3 | HS     |
|                    | 17 | TDr 98/00933        | 0.4 B ± 0.1           | 0.5 B ± 0.2        | 17.1 (0 -72)                     | 2.4 | HS     |
|                    | 18 | TDr 01/00405        | 3.2 B ± 0.7           | 3.2 A ± 1.3        | 27.7 (0 -139)                    | 3   | HS     |
|                    | 19 | TDr 03/00058        | 2.0 B ± 0.4           | 1.0 B ± 0.3        | 23.7 (0 -75)                     | 2.1 | HS     |
| <b>P</b>           |    |                     | <b>&lt;.0001</b>      | <b>0.0001</b>      | <b>0.1631</b>                    |     |        |
| Land-<br>race      | 20 | TDr Dente           | 0.2 ± 0.1             | 0.1 B              | 0                                | 2   | R      |
|                    | 21 | TDr Agbanwobe       | 0.4 ± 0.2             | 0.3 B ± 0.1        | 0                                | 1.8 | R      |
|                    | 22 | TDr 08-21-2 (Ekpe)  | 080.3                 | 1.9 A ± 0.2        | 168.4 AB (0 -900)                | 2.4 | HS     |
|                    | 23 | TDr Alumako         | 0.5 ± 0.2             | 0.8 B ± 0.2        | 3.1 A (0 -12)                    | 2.7 | HS     |
|                    | 24 | TDr 04-219 (Am-ula) | 0.9 ± 0.2             | 0.4 B ± 0.1        | 30.2 AB (0 -70)                  | 2.3 | HS     |
|                    | 25 | TDr Makakusa        | 0.2 ± 0.1             | 0.3 B ± 0.1        | 23.8 A (0 -119)                  | 2.4 | HS     |
|                    | 26 | TDr Pouna           | 0.8 ± 0.3             | 0.3 B ± 0.1        | 991.3 A (158 -2367)              | 3   | HS     |
| <b>P</b>           |    |                     | <b>0.3807</b>         | <b>&lt;.0001</b>   | <b>0.0052</b>                    |     |        |

SE= Standard Error, GI= galling index, **Rating**=Host reaction rating (**R**=Resistant, **HS**=Hyper susceptible, **na**=not applicable due to shortage of planting material), Gallings score: 1-5 where 1 represents 0 galls and 5 represents >30 galls per root system. Tubers weights with the same letter in the same column are not significantly different according to the SNK test ( $P \leq 0.05$ ); when no significant different no letter is assigned. **Nematode g<sup>-1</sup>** = number of nematodes per gram of root, <sup>a</sup> Means are values of seven replicates.

**Supplementary Table S3.** Tuber weight, plant galling index (GI), nematode produced and rating of accessions reaction to *Meloidogyne enterolobii*.

| Type            | No       | Genotype            | Tuber Weight (g) ± SE |                       | Nematode g <sup>-1</sup><br>root | GI  | Rating |
|-----------------|----------|---------------------|-----------------------|-----------------------|----------------------------------|-----|--------|
|                 |          |                     | Control               | <i>M. enterolobii</i> | Mean (Min-Max)                   |     |        |
| Breeder's lines | 1        | TDr 03/00196        | 0                     | 0.0 A                 | 20 A (0 -40)                     | 2   | R      |
|                 | 2        | TDr 00/00362        | 0.5 B ± 0             | .                     | .                                | 1   | R      |
|                 | 3        | TDr 95/01932        | 0.3 B                 | 0.2 A ± 0             | 0                                | 1   | R      |
|                 | 4        | TDr 94/01108        | 0.2 B ± 0.1           | 1.1 A ± 0.2           | 2.6 A (0 -10)                    | 2.9 | HS     |
|                 | 5        | TDr 03/00180        | 0.8 B ± 0.3           | .                     | .                                |     | Na     |
|                 | 6        | TDr 96/00604        | 0.1 B                 | .                     | .                                |     | Na     |
|                 | 7        | TDr 99/02674        | 0.1 B ± 0.1           | .                     | .                                |     | Na     |
|                 | 8        | TDr 89/02475        | 0.2 B ± 0             | .                     | .                                |     | Na     |
|                 | 9        | TDr 89/02672        | 0.7 B ± 0.2           | 1.5 A ± 0.9           | 0                                | 1.8 | R      |
|                 | 10       | TDr 96/01817        | 1.0 B ± 0.4           | 2.4 A ± 0.8           | 0                                | 1.8 | R      |
|                 | 11       | TDr 97/00840        | 0.4 B ± 0.2           | 0.6 A ± 0.3           | 0                                | 1   | R      |
|                 | 12       | TDr 07/00873        | .                     | .                     | .                                |     | Na     |
|                 | 13       | TDr 02/00515        | 0.6 B ± 0.4           | 0.8 A ± 0.7           | 0                                | 1   | R      |
|                 | 14       | TDr 00/00403        | 0.3 B ± 0.2           | 0.3 A ± 0.1           | 0                                | 1.6 | R      |
|                 | 15       | TDr 07/00168        | 1.0 B                 | 0.2 A ± 0.2           | 0                                | 1.7 | R      |
|                 | 16       | TDr 95/18544        | 1.0 B ± 0.3           | 1.5 A ± 0.8           | 181.9 A (0 -1106)                | 3   | HS     |
|                 | 17       | TDr 98/00933        | 0. B ± 40.1           | 0.7 A ± 0.3           | 159.9 A (0 -1000)                | 2.3 | HS     |
|                 | 18       | TDr 01/00405        | 3.2 A ± 0.7           | .                     | .                                |     | Na     |
|                 | 19       | TDr 03/00058        | 2.0 B ± 0.4           | 2.9 A ± 1.2           | 17.1 A (0 -69)                   | 2.8 | HS     |
|                 | <b>P</b> |                     | <b>&lt;.0001</b>      | <b>0.2460</b>         | <b>0.2787</b>                    |     |        |
| Landrace        | 20       | TDr Dente           | 0.2 A ± 0.1           | .                     | .                                | 1   | R      |
|                 | 21       | TDr Agbanwobe       | 0.4 A ± 0.2           | 0.2 B ± 0             | 0                                | 2   | R      |
|                 | 22       | TDr 08-21-2 (Ekpe)  | 0.8 A ± 0.3           | 0.8 A ± 0.2           | 46.7 A (0 -187)                  | 2.2 | HS     |
|                 | 23       | TDr Alumako         | 0.5 A ± 0.2           | .                     | .                                |     | Na     |
|                 | 24       | TDr 04-219 (Am-ula) | 0.9 A ± 0.2           | 0.2 B ± 0             | 94.4 A (0 -567)                  | 2.2 | HS     |
|                 | 25       | TDr Makakusa        | 0.2 A ± 0.1           | 0.1 B                 | 0                                | 2   | R      |
|                 | 26       | TDr Pouna           | 0.8 A ± 0.3           | .                     | .                                |     | Na     |
|                 | <b>P</b> |                     | <b>0.3807</b>         | <b>0.0212</b>         | <b>0.8627</b>                    |     |        |

**SE**= Standard Error, **GI**= galling index, **Rating**=Host reaction rating (**R**=Resistant, **HS**=Hyper susceptible, **na**=not applicable due to shortage of planting material), Gallings score: 1-5 where 1 represents 0 galls and 5 represents >30 galls per root system. Tubers weights with the same letter in the same column are not significantly different according to the SNK test ( $P \leq 0.05$ ); when no significant different no letter is assigned. **Nematode g<sup>-1</sup>** = number of nematodes per gram of root, <sup>a</sup> Means are values of seven replicates.

**Supplementary Table S4.** Tuber weight, plant galling index (GI), nematode produced and rating of accessions reaction to *Meloidogyne arenaria*.

| Type            | No | Genotype            | Tuber Weight (g) $\pm$ SE |                    | Nematode g <sup>-1</sup><br>root | GI  | Rating |
|-----------------|----|---------------------|---------------------------|--------------------|----------------------------------|-----|--------|
|                 |    |                     | Control                   | <i>M. arenaria</i> | Mean (Min-Max)                   |     |        |
| Breeder's lines | 1  | TDr 03/00196        | 0                         | 0.1 B $\pm$ 0.1    | 35.3 A (0 -100)                  | 1   | R      |
|                 | 2  | TDr 00/00362        | 0.5 B $\pm$ 0             | 0.2 B $\pm$ 0.1    | 50 A (0 -100)                    | 2   | R      |
|                 | 3  | TDr 95/01932        | 0.3 B                     | 0.2 B $\pm$ 0.1    | 0                                | 2   | R      |
|                 | 4  | TDr 94/01108        | 0.2 B $\pm$ 0.1           | 0.2 B $\pm$ 0.1    | 8.9 A (0 -45)                    | 2   | R      |
|                 | 5  | TDr 03/00180        | 0.8 B $\pm$ 0.3           | .                  | 0                                | 1   | R      |
|                 | 6  | TDr 96/00604        | 0.1 B                     | .                  | .                                |     | Na     |
|                 | 7  | TDr 99/02674        | 0.1 B $\pm$ 0.1           | 0.2 B $\pm$ 0.1    | 0                                | 2   | R      |
|                 | 8  | TDr 89/02475        | 0.2 B $\pm$ 0             | 0.1 B $\pm$ 0.1    | 0                                | 1.3 | R      |
|                 | 9  | TDr 89/02672        | 0.7 B $\pm$ 0.2           | 0.7 B $\pm$ 0.4    | 66.7 A (0 -140)                  | 1.3 | R      |
|                 | 10 | TDr 96/01817        | 1.0 B $\pm$ 0.4           | 2.8 A $\pm$ 0.9    | 2.9 A (0 -21)                    | 1.6 | R      |
|                 | 11 | TDr 97/00840        | 0.4 B $\pm$ 0.2           | 0.3 B $\pm$ 0.3    | 80 A (80 -80)                    | 1.7 | R      |
|                 | 12 | TDr 07/00873        | .                         | .                  | .                                | 1   | R      |
|                 | 13 | TDr 02/00515        | 0.6 B $\pm$ 0.4           | 0.3 B $\pm$ 0      | 0                                | 1.6 | R      |
|                 | 14 | TDr 00/00403        | 0.3 B $\pm$ 0.2           | 0.3 B $\pm$ 0.1    | 99 A (0 -320)                    | 2   | R      |
|                 | 15 | TDr 07/00168        | 1.0 B                     | 0.5 B $\pm$ 0.1    | 0                                | 1.8 | R      |
|                 | 16 | TDr 95/18544        | 1.0 B $\pm$ 0.3           | 0.4 B $\pm$ 0      | 0                                | 1.2 | R      |
|                 | 17 | TDr 98/00933        | 0.4 B $\pm$ 0.1           | 0.1 B $\pm$ 0      | 0                                | 2   | R      |
|                 | 18 | TDr 01/00405        | 3.2 B $\pm$ 0.7           | 1.6 B $\pm$ 0.5    | 0                                | 2   | R      |
|                 | 19 | TDr 03/00058        | 2.0 B $\pm$ 0.4           | 0.4 B $\pm$ 0.1    | 310 A (0 -1860)                  | 1   | R      |
| P               |    |                     | <.0001                    | 0.0015             | 01807                            |     |        |
| Landrace        | 20 | TDr Dente           | 0.2 A $\pm$ 0.1           | .                  | .                                | 1   | R      |
|                 | 21 | TDr Agbanwobe       | 0.4 A $\pm$ 0.2           | 0.1 A $\pm$ 0.1    | 166.7 A (0 -334)                 | 2   | R      |
|                 | 22 | TDr 08-21-2 (Ekpe)  | 0.8 A $\pm$ 0.3           | 1.0 A $\pm$ 0.4    | 3.3 A (0 -17)                    | 1.2 | R      |
|                 | 23 | TDr Alumako         | 0.5 A $\pm$ 0.2           | .                  | 0                                | 1.7 | R      |
|                 | 24 | TDr 04-219 (Am-ula) | 0.9 A $\pm$ 0.2           | 0.7 A $\pm$ 0.1    | 102.5 A (0 -410)                 | 2.3 | HS     |
|                 | 25 | TDr Makakusa        | 0.2 A $\pm$ 0.1           | 0.2 A $\pm$ 0.1    | 18.8 A (0 -57)                   | 1.7 | R      |
|                 | 26 | TDr Pouna           | 0.8 A $\pm$ 0.3           | .                  | .                                |     | Na     |
| P               |    |                     | 0.3807                    | 0.1662             | 0.8109                           |     |        |

SE= Standard Error, GI= galling index, Rating=Host reaction rating (R=Resistant, HS=Hyper susceptible, na=not applicable due to shortage of planting material), Gallings score: 1-5 where 1 represents 0 galls and 5 represents >30 galls per root system. Tubers weights with the same letter in the same column are not significantly different according to the SNK test ( $P \leq 0.05$ ); when no significant different no letter is assigned. Nematode g<sup>-1</sup> = number of nematodes per gram of root, <sup>a</sup> Means are values of seven replicates.

**Supplementary Table S5.** Tuber weight, plant damage index (DI), nematode produced and rating of accessions reaction to *Scutellonema bradys*.

| Type | No | Genotype     | Tuber Weight (g) A $\pm$ SE |                  | Nematode g <sup>-1</sup><br>root | DI  | Rating |
|------|----|--------------|-----------------------------|------------------|----------------------------------|-----|--------|
|      |    |              | Control                     | <i>S. bradys</i> | Mean (Min-Max)                   |     |        |
|      | 1  | TDr 03/00196 | 0.0 B $\pm$ 0.0             | 0.1 B $\pm$ 0.0  | 68 A (0 -200)                    | 2   | R      |
|      | 2  | TDr 00/00362 | 0.5 B $\pm$ 0.0             | 0.4 B $\pm$ 0.1  | 708.8 A (16 -2040)               | 2.3 | HS     |

|                        |          |                     |                  |               |                    |     |    |
|------------------------|----------|---------------------|------------------|---------------|--------------------|-----|----|
| <b>Breeder's lines</b> | 3        | TDr 95/01932        | 0.3 B            | 0.5 B ± 0.1   | 12.2 A (0 -23)     | 2.3 | HS |
|                        | 4        | TDr 94/01108        | 0.2 B ± 0.1      | .             | .                  |     | Na |
|                        | 5        | TDr 03/00180        | 0.8 B ± 0.3      | 0.6 B ± 0.1   | 82.1 A (0 -165)    | 2.5 | HS |
|                        | 6        | TDr 96/00604        | 0.1 B            | .             | 0                  | 0.3 | R  |
|                        | 7        | TDr 99/02674        | 0.1 B ± 0.1      | 0.2 B ± 0.1   | 0                  | 1.4 | R  |
|                        | 8        | TDr 89/02475        | 0.2 B ± 0.0      | 0.2 B ± 0.1   | 0                  | 2   | R  |
|                        | 9        | TDr 89/02672        | 0.7 B ± 0.2      | 2.1 A ± 1.3   | 78.8 A (0 -148)    | 3.8 | HS |
|                        | 10       | TDr 96/01817        | 1.0 B ± 0.4      | 2 B ± 0.5     | 82.3 A (0 -377)    | 2.9 | HS |
|                        | 11       | TDr 97/00840        | 0.4 B ± 0.2      | 0.5 B ± 0.2   | 55.8 A (0 -260)    | 3   | HS |
|                        | 12       | TDr 07/00873        | .                | 0.1 B ± 0.1   | 17 A (10 -25)      | 0.8 | R  |
|                        | 13       | TDr 02/00515        | 0.6 B ± 0.4      | 0.5 B ± 0.1   | 0                  | 1   | R  |
|                        | 14       | TDr 00/00403        | 0.3 B ± 0.2      | 0.4 B ± 0.1   | 36.9 A (0 -112)    | 2.4 | HS |
|                        | 15       | TDr 07/00168        | 1.0 B            | 0.5 B         | 0                  | 2   | R  |
|                        | 16       | TDr 95/18544        | 1.0 B ± 0.3      | 1 B ± 0.3     | 55 A (0 -110)      | 3   | HS |
|                        | 17       | TDr 98/00933        | 0.4 B ± 0.1      | 0.5 B ± 0.3   | 13.9 A (0 -50)     | 1.9 | R  |
|                        | 18       | TDr 01/00405        | 3.2 A ± 0.7      | 1.6 B ± 0.6   | 0                  | 2   | R  |
|                        | 19       | TDr 03/00058        | 2.0 B ± 0.4      | 0.7 B ± 0.3   | 9.8 A (0 -30)      | 3   | HS |
|                        | <b>P</b> |                     | <b>&lt;.0001</b> | <b>0.0104</b> | <b>0.0953</b>      |     |    |
| <b>Landrace line</b>   | 20       | TDr Dente           | 0.2 A ± 0.1      | 0.3 A ± 0.0   | 20 A (0 -40)       | 1   | R  |
|                        | 21       | TDr Agbanwobe       | 0.4 A ± 0.2      |               | .                  |     | Na |
|                        | 22       | TDr 08-21-2 (Ekpe)  | 0.8 A ± 0.3      | 1.6 A ± 0.6   | 112.4 A (18 -354)  | 2.8 | HS |
|                        | 23       | TDr Alumako         | 0.5 A ± 0.2      | 0.5 A ± 0.1   | 45.4 A (0 -150)    | 1.7 | R  |
|                        | 24       | TDr 04-219 (Am-ula) | 0.9 A ± 0.2      | 0.3 A ± 0.1   | 12 A (0 -60)       | 2.8 | HS |
|                        | 25       | TDr Makakusa        | 0.2 A ± 0.1      | 0.2 A ± 0.0   | 257.7 A (0 -516)   | 2.5 | HS |
|                        | 26       | TDr Pouna           | 0.8 A ± 0.3      | 0.2 A         | 1100 A (900 -1300) | 0.8 | R  |
|                        | <b>P</b> |                     | <b>0.3807</b>    |               | <b>0.0719</b>      |     |    |

**SE**= Standard Error, **DI**= damage index, **Rating**=Host reaction rating (**R**=Resistant, **HS**=Hyper susceptible, **na**=not applicable due to shortage of planting material), Damage score scale: 1-5 where 1 represents 0% and 5 represents >75%. Tubers weights with the same letter in the same column are not significantly different according to the SNK test ( $P \leq 0.05$ ); when no significant different no letter is assigned. **Nematode**.  $g^{-1}$  = number of nematodes per gram of root, <sup>a</sup> Means are values of seven replicates.
